# Supplementary material for: From isolation to integration: Assessing habitat connectivity of the endangered saiga antelope in Mongolia
Source: Research Square preprint supplement (doi:10.21203/rs.3.rs-3257251/v1), 2023-08-29
Supplement: Supplementary file 1 [file 207facdbc602a9b4e1c31ddd.docx]

**Supplementary material**

**From isolation to integration: Assessing habitat connectivity of the endangered saiga antelope in Mongolia**

Buyanaa Chimeddorj, Bayarbaatar Buuveibaatar, Naranbaatar Galsandorj, Sanjmyatav Dolgorjav, Nyamkhuu Myanganbuu, Gantulga Bayadonoi, Sundev Gombobaatar

Supplementary Table 1. The landform resistance values used for this study (upland/flat is the least resistant while steep and N aspect have highest resistance value)

| **Landform type** | **Resistance value** | **GPS points** | **Percentage** |
| --- | --- | --- | --- |
| Upland, flat | 1 | 33,704 | 50.196 |
| Depression | 2 | 23,673 | 35.257 |
| Water tracks | 3 | 7,903 | 11.770 |
| Gentle slope, N aspect | 4 | 1,533 | 2.283 |
| Gentle slope, S aspect | 5 | 324 | 0.483 |
| Steep, S aspect | 6 | 5 | 0.007 |
| Steep, N aspect | 7 | 3 | 0.004 |
| **Overall** | | **67,145** | **100%** |

Supplementary Table 2. Current centrality for the saiga CHs (n = 34) across the study area in western Mongolia. The CHs are ranked according to their centrality values.

| **Rank** | **CH_ID** | **Perimeter, km** | **Area, km2** | **Centrality** |
| --- | --- | --- | --- | --- |
| 1 | 22 | 440.43 | 1,876 | 312.06 |
| 2 | 12 | 50.82 | 151 | 248.53 |
| 3 | 8 | 58.32 | 136 | 234.61 |
| 4 | 7 | 86.93 | 134 | 180.03 |
| 5 | 14 | 100.56 | 265 | 162.55 |
| 6 | 23 | 81.79 | 147 | 149.32 |
| 7 | 21 | 137.72 | 413 | 145.02 |
| 8 | 10 | 143.73 | 595 | 132.33 |
| 9 | 27 | 132.45 | 503 | 130.74 |
| 10 | 24 | 65.29 | 211 | 118.91 |
| 11 | 31 | 94.89 | 413 | 117.93 |
| 12 | 26 | 106.91 | 435 | 117.65 |
| 13 | 15 | 70.16 | 256 | 114.99 |
| 14 | 28 | 48.58 | 118 | 110.35 |
| 15 | 33 | 529.67 | 2,878 | 110.32 |
| 16 | 29 | 85.12 | 367 | 108.29 |
| 17 | 25 | 48.29 | 124 | 104.41 |
| 18 | 16 | 59.88 | 185 | 103.56 |
| 19 | 3 | 75.46 | 254 | 99.64 |
| 20 | 4 | 68.23 | 153 | 94.42 |
| 21 | 20 | 119.53 | 275 | 91.15 |
| 22 | 9 | 24.24 | 28 | 89.47 |
| 23 | 19 | 37.71 | 59 | 83.72 |
| 24 | 32 | 60.43 | 117 | 74.43 |
| 25 | 6 | 52.25 | 159 | 73.48 |
| 26 | 5 | 20.36 | 23 | 61.37 |
| 27 | 18 | 65.28 | 117 | 55.17 |
| 28 | 34 | 40.68 | 90 | 50.97 |
| 29 | 2 | 212.51 | 833 | 50.08 |
| 30 | 30 | 73.42 | 207 | 48.62 |
| 31 | 13 | 149.03 | 387 | 48.08 |
| 32 | 11 | 22.34 | 21 | 45.97 |
| 33 | 17 | 55.85 | 175 | 40.34 |
| 34 | 1 | 103.76 | 375 | 38.35 |

Supplementary Table 3. Characteristics of the 68 mapped saiga habitat linkages identified from the connectivity analyses across the study area in Mongolia, Russia, and China. **EUD**: Euclidean distance (straight-line distance), **CWD**: Cost-weighted distance, **LCP**: Least cost path (shortest path following the landscape with least resistance). Linkages are sorted by decreasing current flow **Centrality** (a measure of the importance of the particular link in maintaining the connectivity in the landscape), which is calculated by summing current flowing through each link when different combinations of CH pairs are used as source and ground in the software Centrality Mapper. **CWD: EUD** is a quality measure of linkages. For the highest possible quality linkage, the CWD is equivalent to EUD, and the ratio is 1. This ratio indicates how difficult it is to move between CHs relative to how close they are. **CWD: CLP** gives the average resistance encountered along the optimal paths between the CHs.

| **Rank** | **From_Core** | **To_Core** | **EUD, km** | **LCP, km** | **CWD, km** | **CWD: EUD** | **CWD: LCP** | **Centrality** |
| --- | --- | --- | --- | --- | --- | --- | --- | --- |
| 1 | 12 | 22 | 18.13 | 21.40 | 52.18 | 2.88 | 2.44 | 128.92 |
| 2 | 8 | 12 | 16.08 | 30.64 | 66.71 | 4.15 | 2.18 | 127.99 |
| 3 | 22 | 23 | 5.84 | 6.35 | 15.22 | 2.61 | 2.40 | 110.61 |
| 4 | 7 | 8 | 28.45 | 31.21 | 67.13 | 2.36 | 2.15 | 108.37 |
| 5 | 7 | 12 | 17.01 | 18.60 | 39.98 | 2.35 | 2.15 | 92.95 |
| 6 | 8 | 9 | 2.01 | 2.56 | 5.94 | 2.95 | 2.32 | 82.23 |
| 7 | 12 | 15 | 26.88 | 33.79 | 80.28 | 2.99 | 2.38 | 80.56 |
| 8 | 31 | 33 | 6.16 | 6.89 | 14.92 | 2.42 | 2.17 | 75.32 |
| 9 | 21 | 22 | 7.98 | 8.97 | 18.71 | 2.34 | 2.09 | 71.23 |
| 10 | 15 | 16 | 2.43 | 3.91 | 9.21 | 3.79 | 2.35 | 70.41 |
| 11 | 27 | 29 | 16.62 | 18.42 | 40.85 | 2.46 | 2.22 | 70.27 |
| 12 | 8 | 10 | 7.35 | 8.30 | 18.92 | 2.57 | 2.28 | 68.74 |
| 13 | 23 | 24 | 2.75 | 3.22 | 6.67 | 2.43 | 2.07 | 66.27 |
| 14 | 20 | 22 | 2.72 | 3.62 | 7.41 | 2.72 | 2.05 | 62.35 |
| 15 | 25 | 33 | 31.68 | 35.68 | 82.21 | 2.60 | 2.30 | 62.18 |
| 16 | 26 | 28 | 4.52 | 27.04 | 57.59 | 12.74 | 2.13 | 60.97 |
| 17 | 3 | 4 | 19.20 | 21.61 | 49.19 | 2.56 | 2.28 | 60.80 |
| 18 | 14 | 22 | 45.17 | 51.74 | 130.21 | 2.88 | 2.52 | 57.73 |
| 19 | 21 | 24 | 8.07 | 9.54 | 20.50 | 2.54 | 2.15 | 57.58 |
| 20 | 19 | 21 | 5.00 | 5.52 | 12.40 | 2.48 | 2.25 | 53.42 |
| 21 | 28 | 33 | 6.08 | 7.20 | 15.70 | 2.58 | 2.18 | 50.13 |
| 22 | 23 | 26 | 16.57 | 18.30 | 43.64 | 2.63 | 2.38 | 49.92 |
| 23 | 14 | 20 | 45.76 | 58.73 | 152.24 | 3.33 | 2.59 | 49.57 |
| 24 | 4 | 8 | 13.89 | 19.96 | 48.40 | 3.49 | 2.42 | 48.90 |
| 25 | 5 | 7 | 13.40 | 14.59 | 32.61 | 2.43 | 2.24 | 47.80 |
| 26 | 16 | 22 | 4.20 | 5.08 | 11.14 | 2.65 | 2.19 | 46.83 |
| 27 | 7 | 14 | 44.02 | 56.32 | 134.62 | 3.06 | 2.39 | 46.24 |
| 28 | 4 | 10 | 11.05 | 13.86 | 31.80 | 2.88 | 2.29 | 46.15 |
| 29 | 15 | 22 | 7.71 | 8.93 | 18.73 | 2.43 | 2.10 | 46.00 |
| 30 | 24 | 26 | 17.52 | 19.26 | 45.05 | 2.57 | 2.34 | 44.40 |
| 31 | 2 | 3 | 11.71 | 12.71 | 27.36 | 2.34 | 2.15 | 44.02 |
| 32 | 5 | 6 | 6.50 | 7.32 | 17.20 | 2.65 | 2.35 | 41.93 |
| 33 | 22 | 25 | 25.32 | 28.37 | 62.61 | 2.47 | 2.21 | 41.29 |
| 34 | 3 | 10 | 39.27 | 43.26 | 97.75 | 2.49 | 2.26 | 40.87 |
| 35 | 9 | 10 | 9.90 | 10.74 | 24.88 | 2.51 | 2.32 | 40.34 |
| 36 | 6 | 14 | 19.20 | 65.88 | 162.36 | 8.46 | 2.46 | 40.33 |
| 37 | 13 | 14 | 19.41 | 22.90 | 50.60 | 2.61 | 2.21 | 40.04 |
| 38 | 31 | 34 | 4.46 | 4.96 | 10.21 | 2.29 | 2.06 | 39.32 |
| 39 | 20 | 25 | 30.06 | 33.61 | 74.55 | 2.48 | 2.22 | 37.37 |
| 40 | 18 | 19 | 11.18 | 12.00 | 29.19 | 2.61 | 2.43 | 37.21 |
| 41 | 24 | 27 | 40.04 | 43.70 | 99.53 | 2.49 | 2.28 | 36.58 |
| 42 | 10 | 11 | 6.55 | 7.55 | 17.46 | 2.67 | 2.31 | 35.57 |
| 43 | 29 | 31 | 8.10 | 8.86 | 20.21 | 2.49 | 2.28 | 34.50 |
| 44 | 27 | 28 | 25.44 | 27.52 | 59.70 | 2.35 | 2.17 | 34.45 |
| 45 | 29 | 30 | 8.53 | 9.22 | 19.80 | 2.32 | 2.15 | 34.18 |
| 46 | 12 | 14 | 46.75 | 52.47 | 125.35 | 2.68 | 2.39 | 33.64 |
| 47 | 31 | 32 | 6.72 | 7.55 | 15.76 | 2.35 | 2.09 | 32.69 |
| 48 | 21 | 27 | 52.90 | 58.73 | 133.29 | 2.52 | 2.27 | 32.59 |
| 49 | 6 | 7 | 23.10 | 25.16 | 57.73 | 2.50 | 2.29 | 31.69 |
| 50 | 26 | 27 | 30.39 | 33.39 | 72.93 | 2.40 | 2.18 | 31.16 |
| 51 | 30 | 32 | 9.52 | 10.28 | 22.72 | 2.39 | 2.21 | 30.05 |
| 52 | 32 | 34 | 1.61 | 7.08 | 15.70 | 9.73 | 2.22 | 29.62 |
| 53 | 19 | 22 | 24.11 | 26.59 | 58.74 | 2.44 | 2.21 | 26.16 |
| 54 | 14 | 17 | 14.35 | 40.01 | 103.95 | 7.24 | 2.60 | 24.56 |
| 55 | 29 | 32 | 11.70 | 12.91 | 30.81 | 2.63 | 2.39 | 23.50 |
| 56 | 18 | 27 | 72.41 | 89.45 | 216.75 | 2.99 | 2.42 | 23.42 |
| 57 | 9 | 11 | 21.47 | 22.84 | 49.68 | 2.31 | 2.18 | 23.37 |
| 58 | 1 | 2 | 19.15 | 23.31 | 48.94 | 2.56 | 2.10 | 23.13 |
| 59 | 13 | 17 | 21.01 | 28.04 | 66.05 | 3.14 | 2.36 | 23.12 |
| 60 | 16 | 21 | 28.27 | 31.26 | 69.75 | 2.47 | 2.23 | 22.51 |
| 61 | 28 | 29 | 30.07 | 32.33 | 70.74 | 2.35 | 2.19 | 21.13 |
| 62 | 28 | 31 | 29.05 | 32.24 | 72.09 | 2.48 | 2.24 | 21.03 |
| 63 | 1 | 3 | 33.19 | 37.01 | 87.30 | 2.63 | 2.36 | 20.58 |
| 64 | 21 | 23 | 19.86 | 23.17 | 49.93 | 2.51 | 2.16 | 19.69 |
| 65 | 23 | 25 | 30.95 | 36.26 | 85.57 | 2.76 | 2.36 | 19.15 |
| 66 | 16 | 19 | 37.22 | 43.93 | 97.78 | 2.63 | 2.23 | 17.65 |
| 67 | 16 | 18 | 54.26 | 62.30 | 148.61 | 2.74 | 2.39 | 16.71 |
| 68 | 25 | 26 | 39.36 | 53.91 | 132.59 | 3.37 | 2.46 | 15.84 |
